# Supplementary material for: Phase separation modulates the assembly and dynamics of a polarity-related scaffold-signaling hub
Source: PubMed Central journal article supplement (PMC9684454; doi:10.1038/s41467-022-35000-2), 2022-11-23
Supplement: 41467_2022_35000_MOESM2_ESM.pdf [file 41467_2022_35000_MOESM2_ESM.pdf]

## **Description of Additional Supplementary Files**

File Name: Supplementary Video 1

Description: The fusion process of two separated YFP-PodJ\_N droplets.

Corresponding to Fig. 2b.

File Name: Supplementary Video 2

Description: The rapid fluorescence recovery of YFP-PodJ\_N droplets after photobleaching. Corresponding to Fig. 2c.

File Name: Supplementary Video 3

Description: The interfacial interaction between YFP-PodJ\_N and SpmX( $\Delta$ TM)-mCherry. Corresponding to Fig. 5d.
